# Supplementary material for: Using RNA-Seq to Identify Reference Genes of the Transition from Brown to White Adipose Tissue in Goats
Source: MDPI journal article supplement (doi:10.3390/ani10091626), 2020-09-10

ACTB-Standard Curve

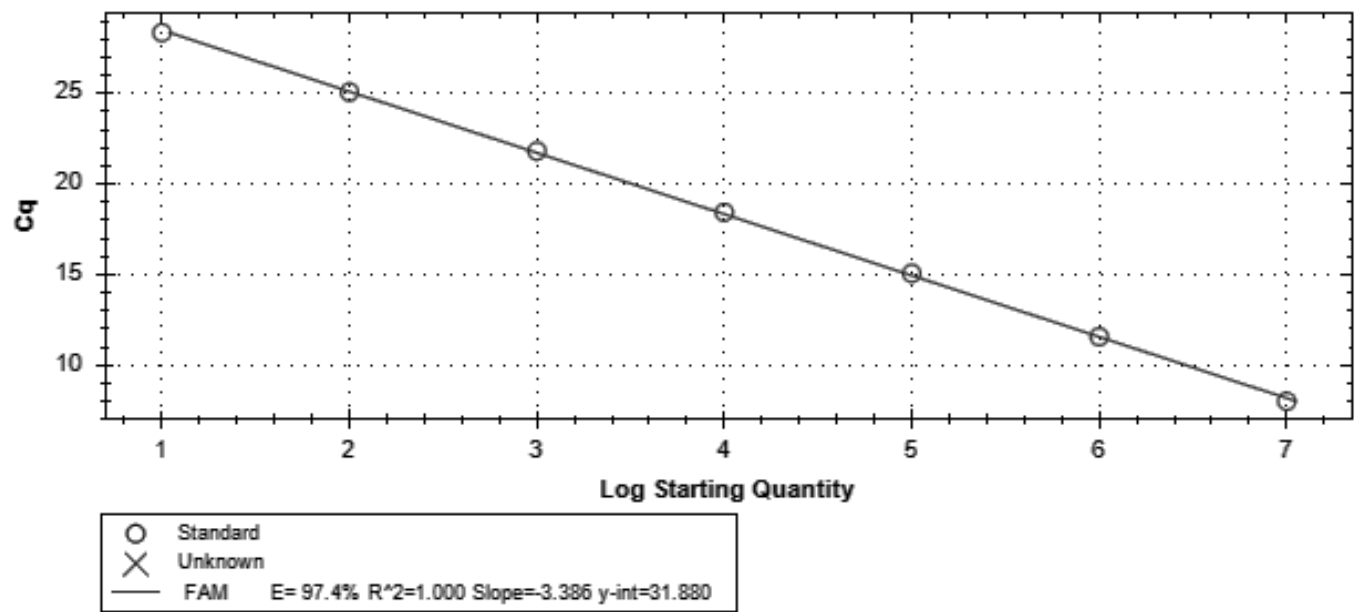

YWHAZ-Standard Curve

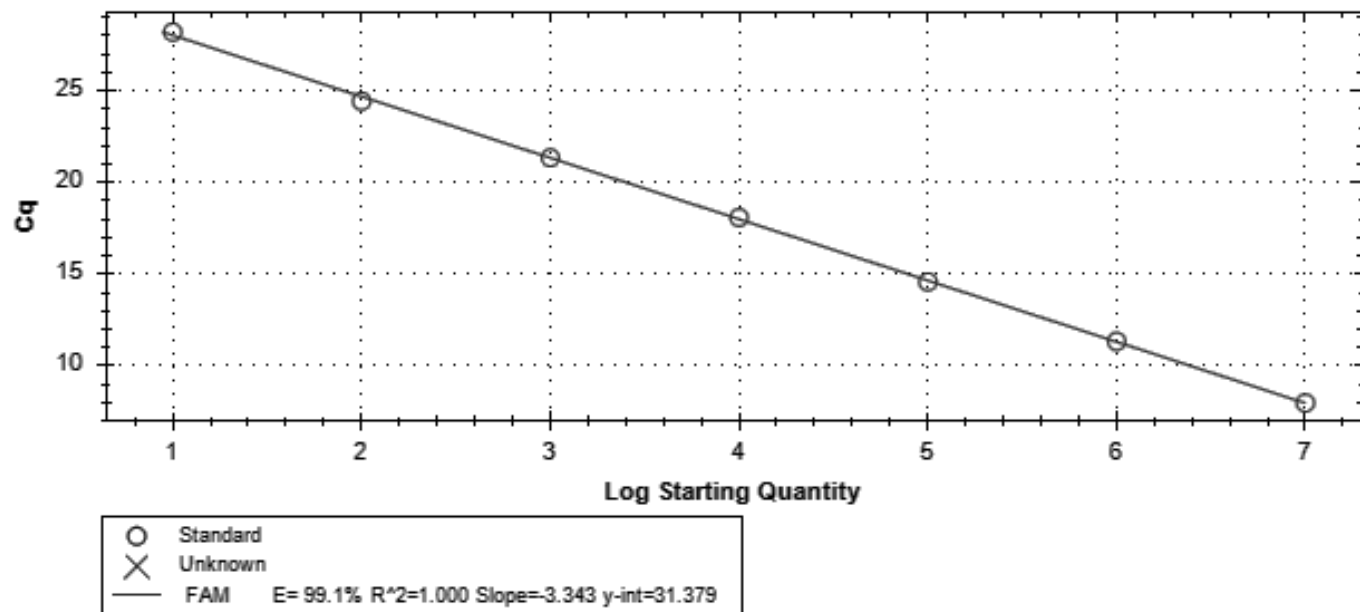

TBP-Standard Curve

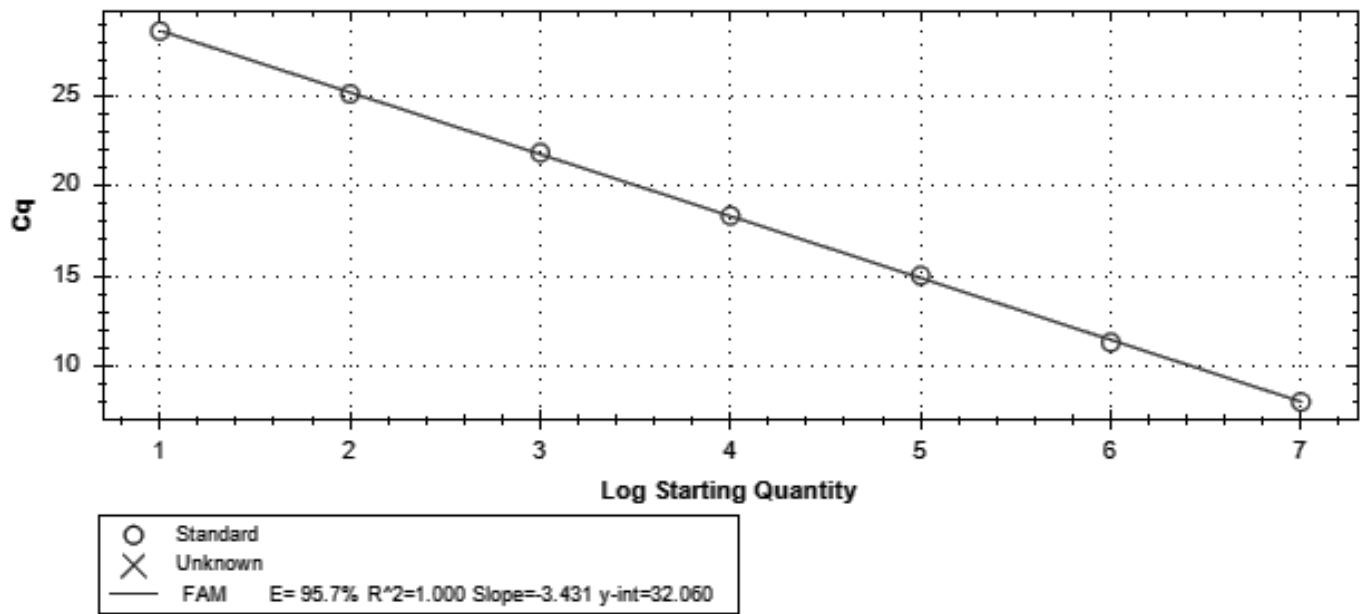

CTNNB1-Standard Curve

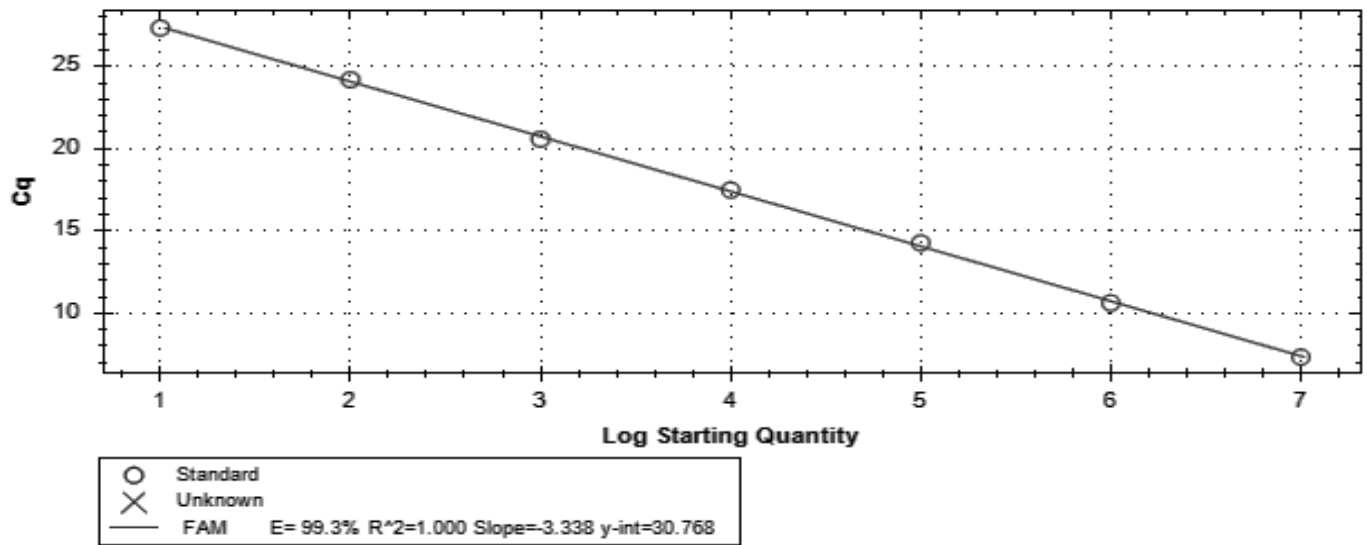

18 SrRNA-Standard Curve

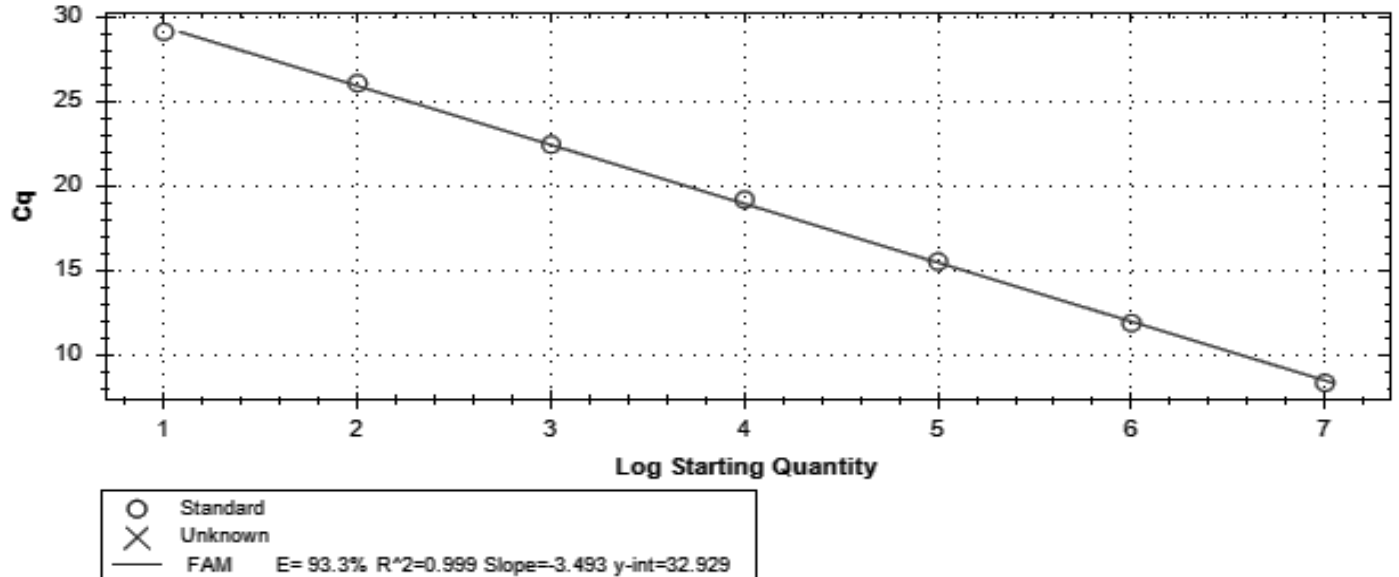

GAPDH-Standard Curve

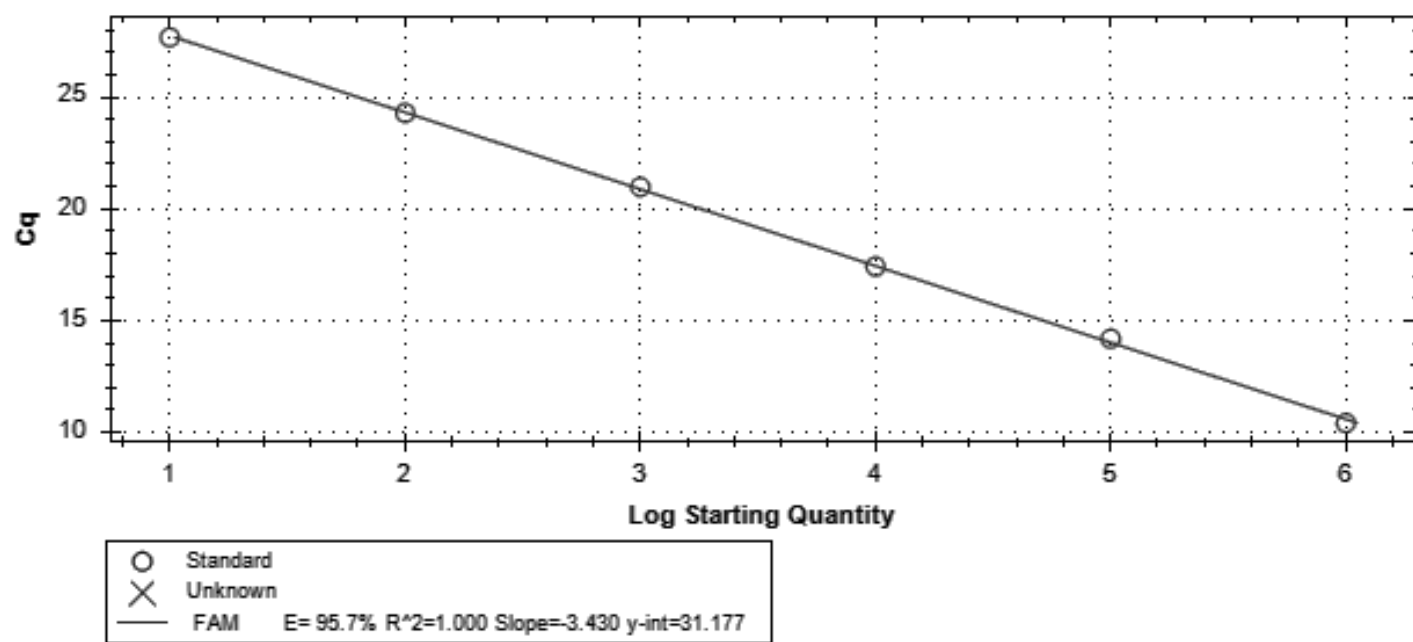

HPRT1-Standard Curve

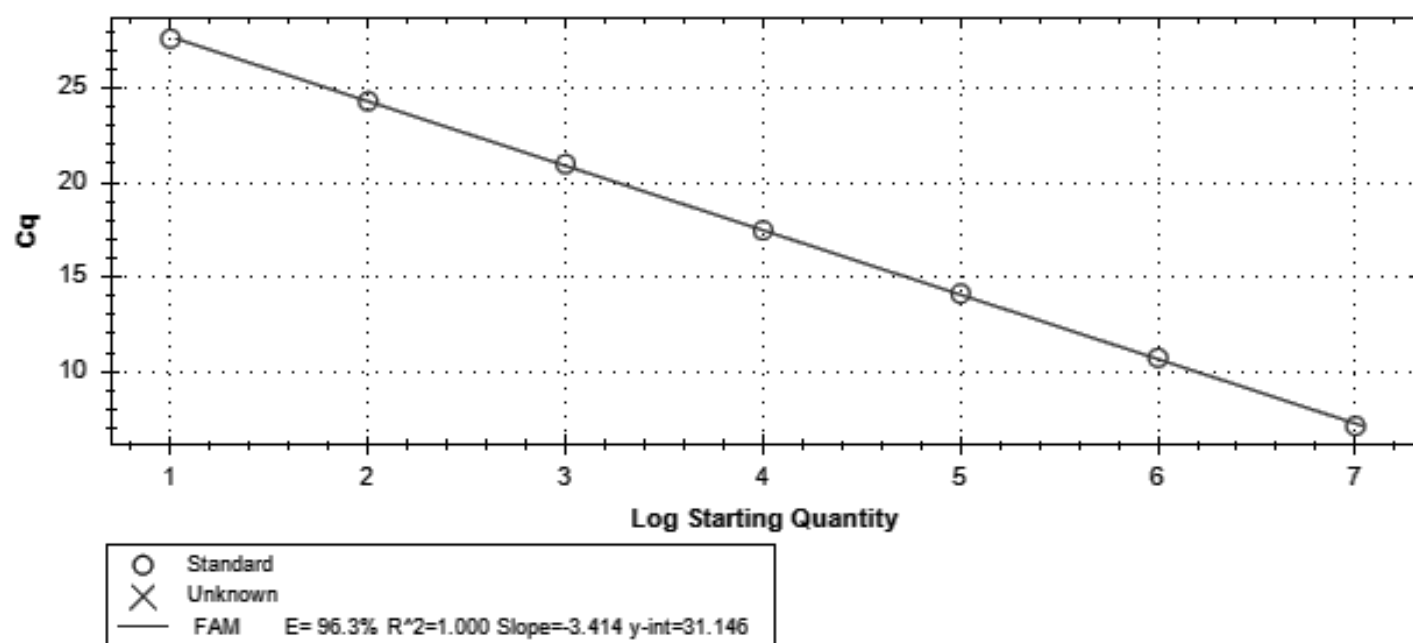

RPLP0-Standard Curve

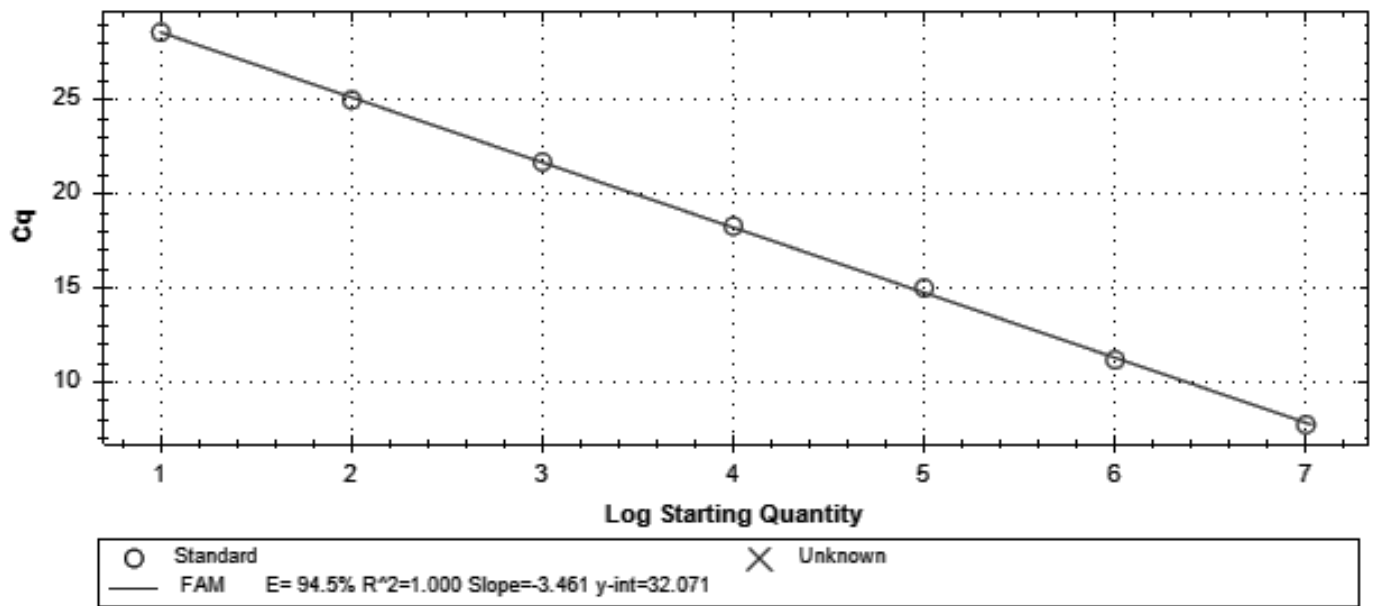

PPIA-Standard Curve

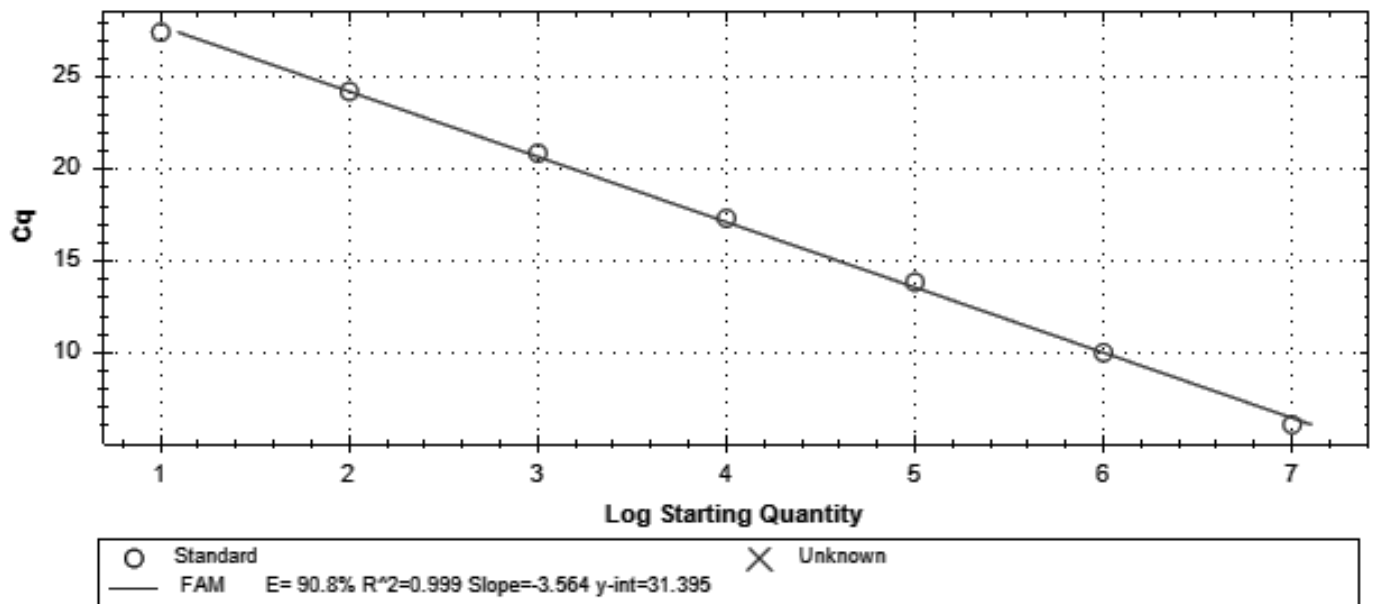

EIF3M-Standard Curve

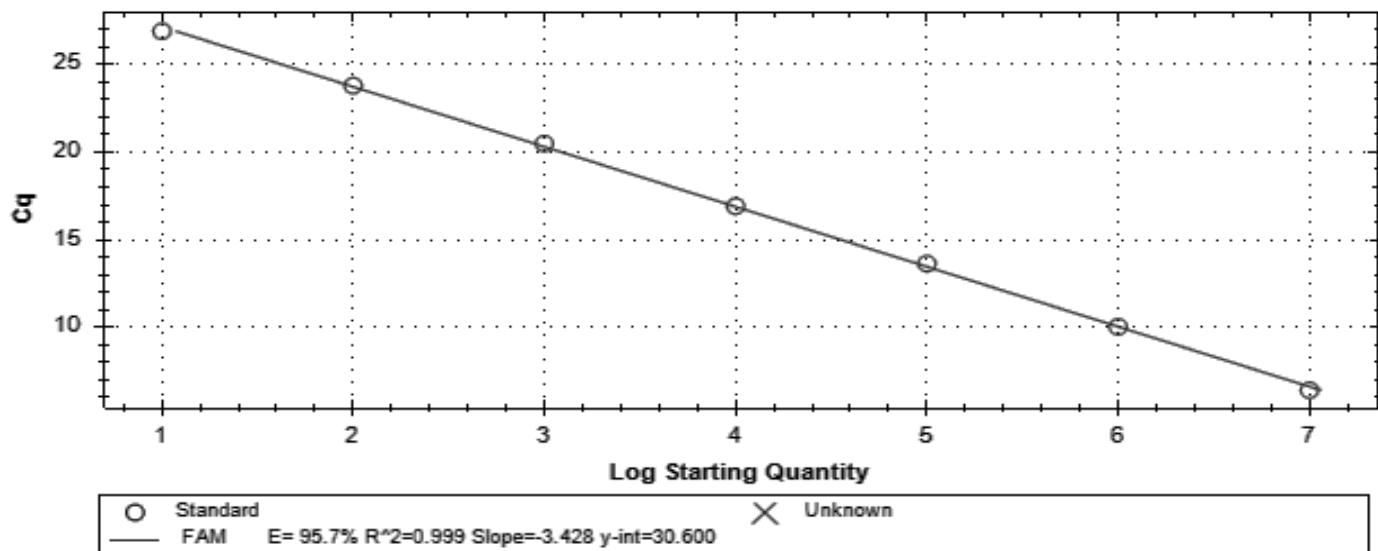

PFDN5-Standard Curve

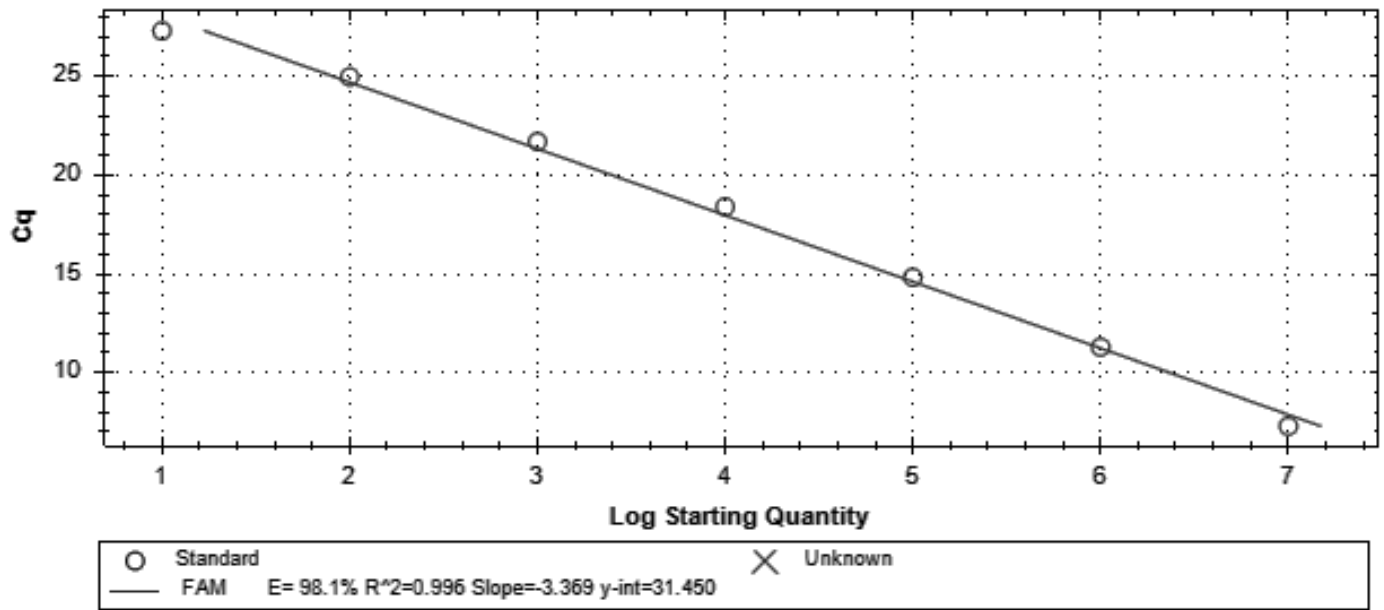

RPL22-Standard Curve

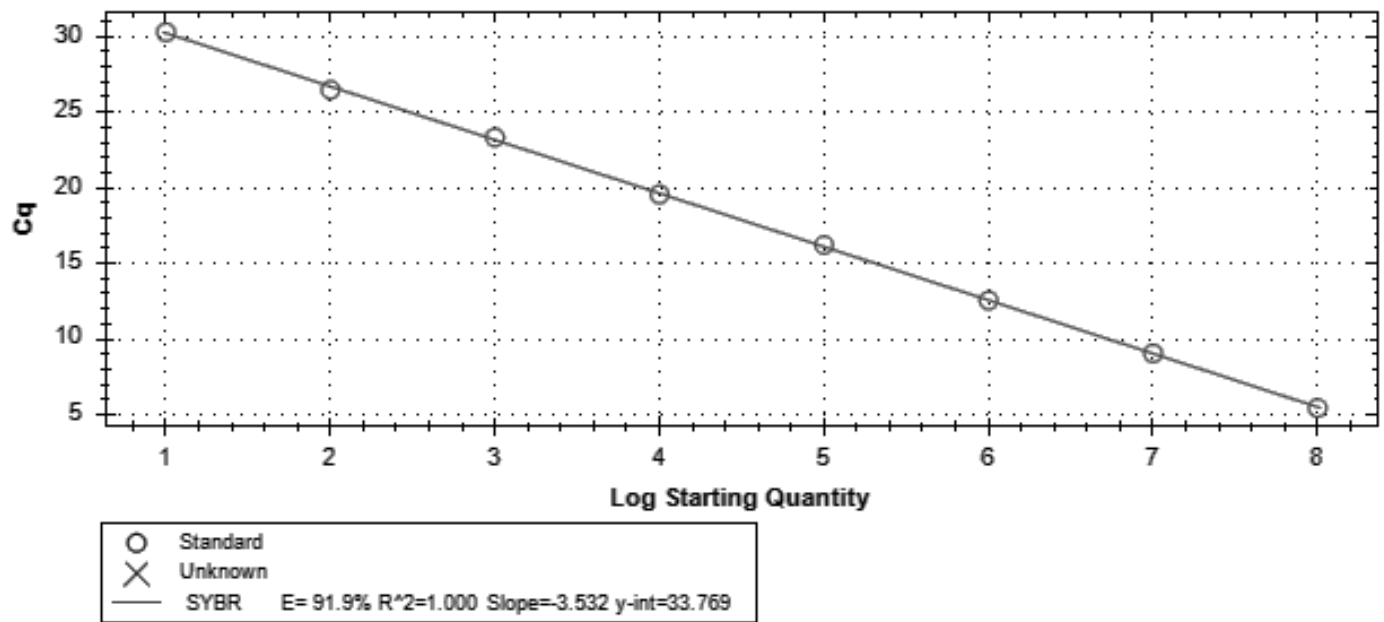

PPARGC1A-Standard Curve

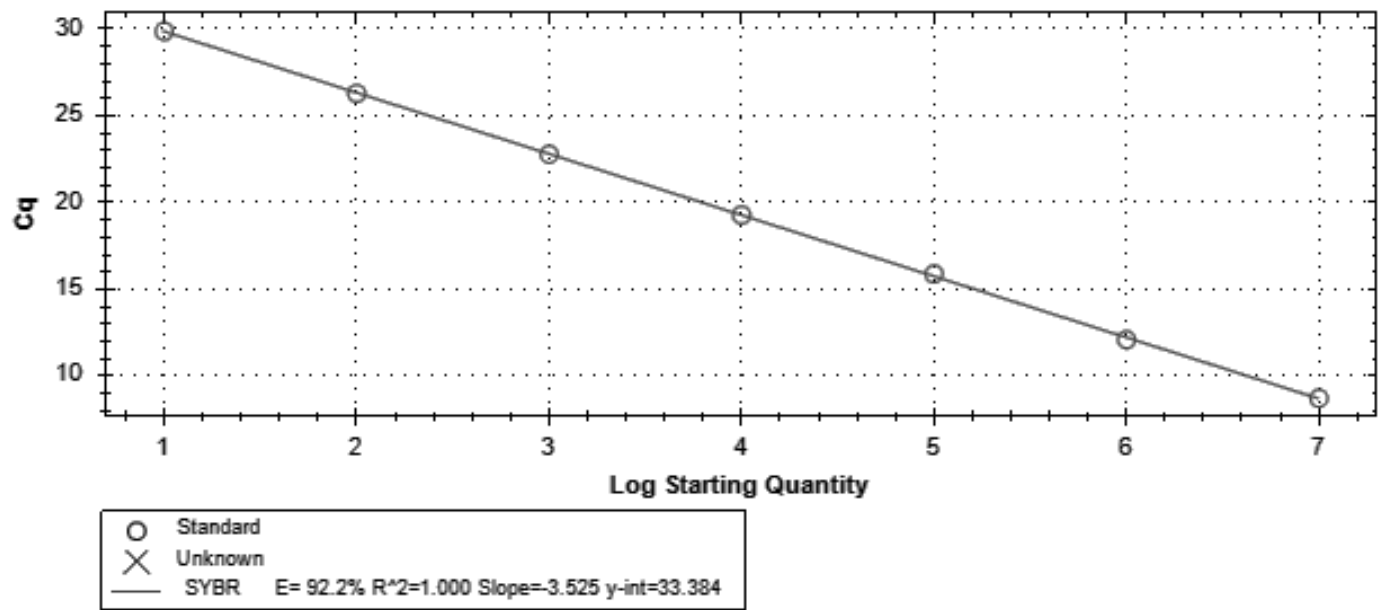

GPAT4-Standard Curve

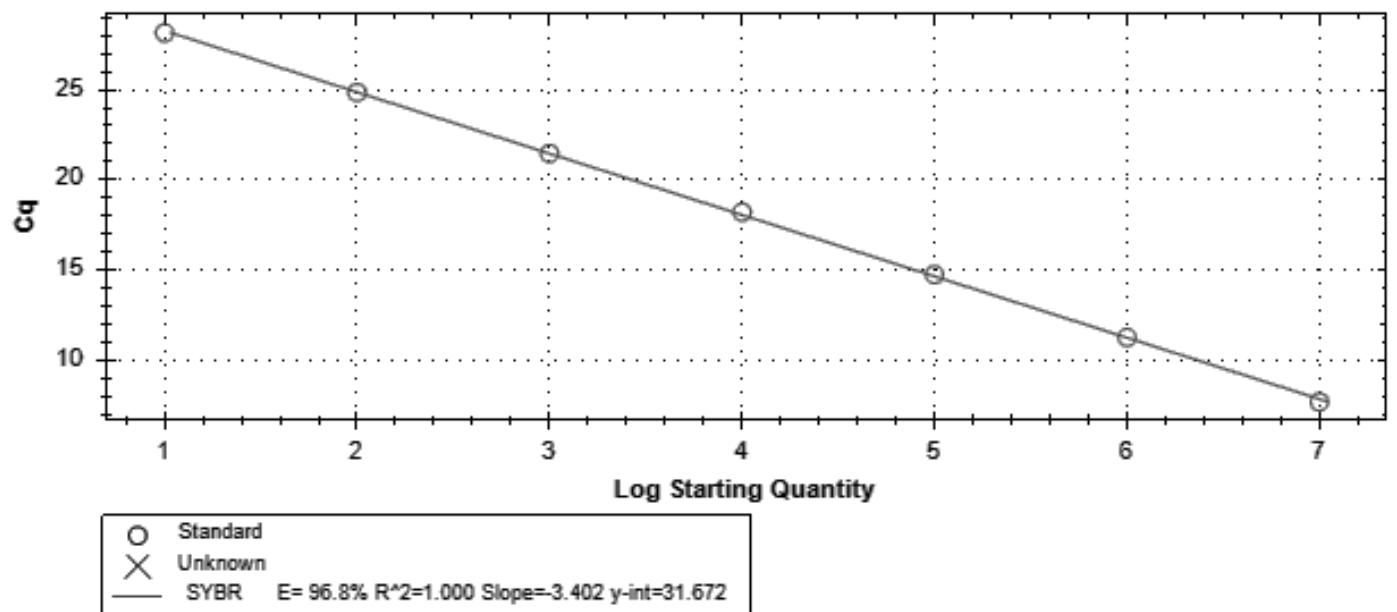

Supplement: s1 [file s1]
