# Supplementary figures and images for: Using RNA-Seq to Identify Reference Genes of the Transition from Brown to White Adipose Tissue in Goats
Source: MDPI journal article supplement (doi:10.3390/ani10091626), 2020-09-10

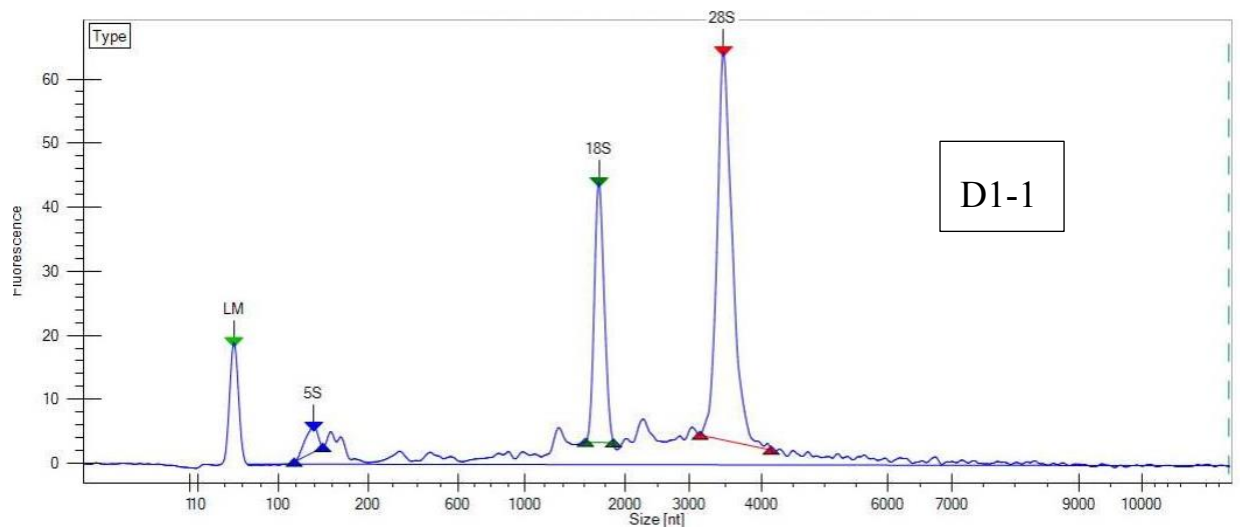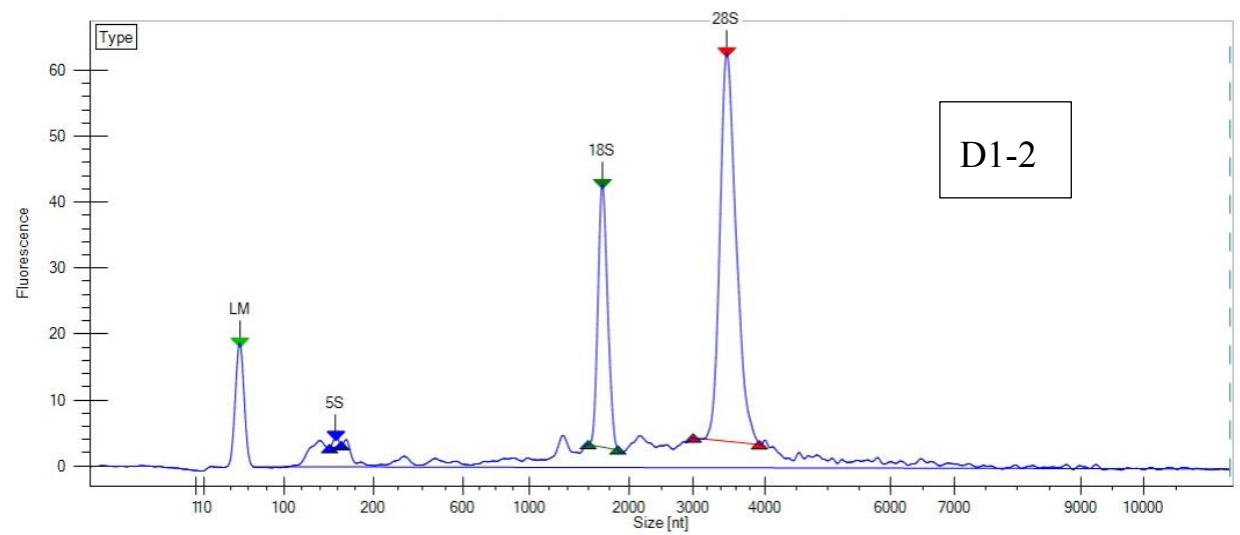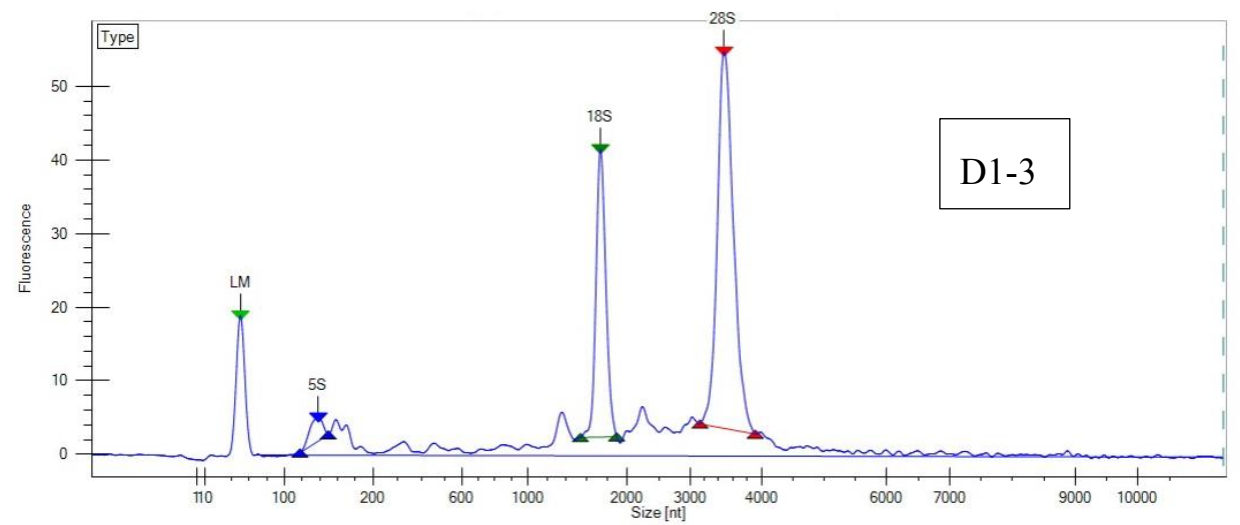

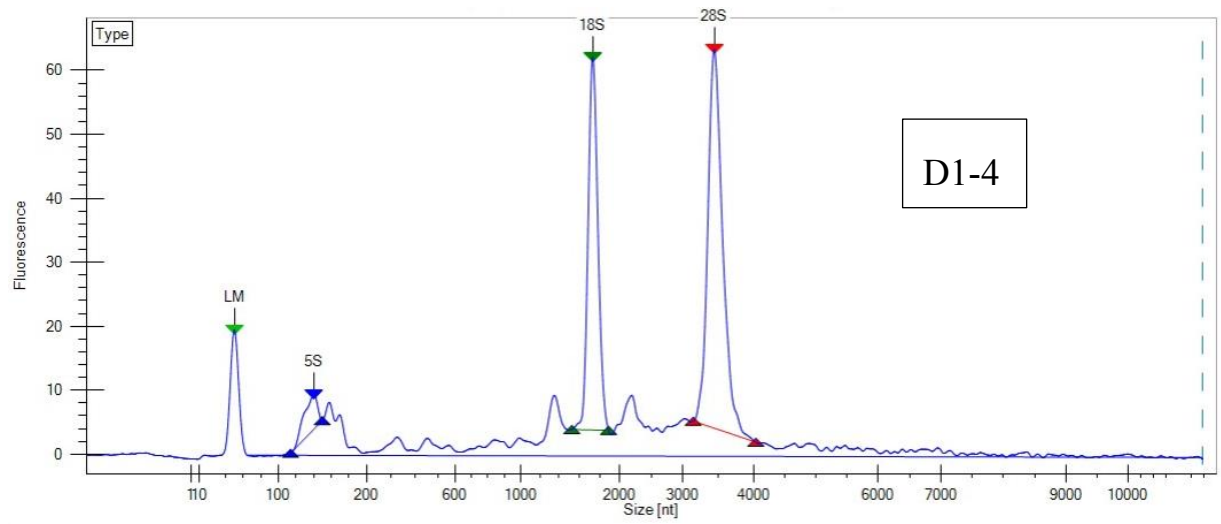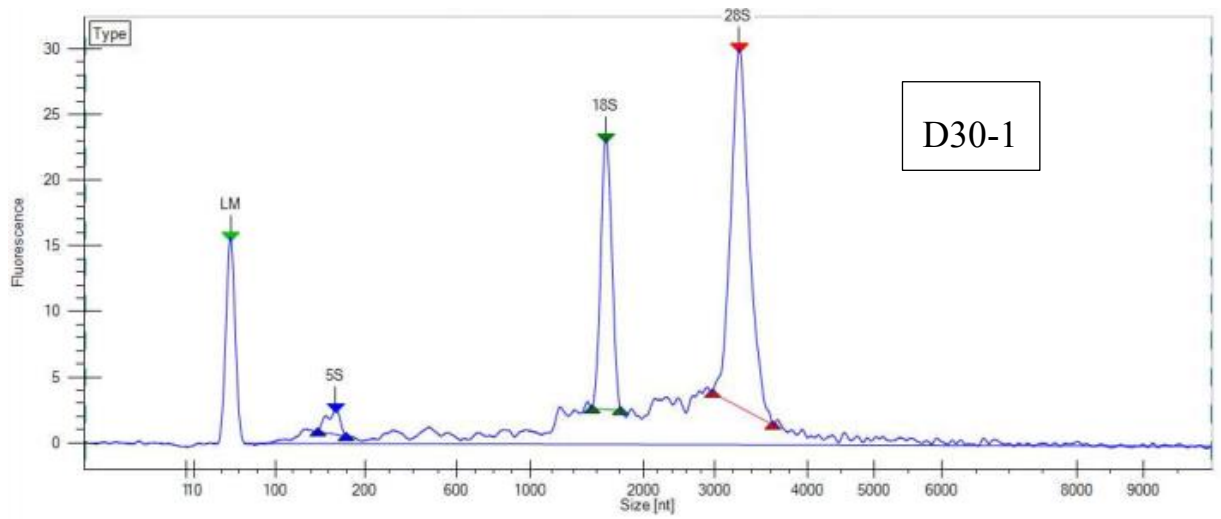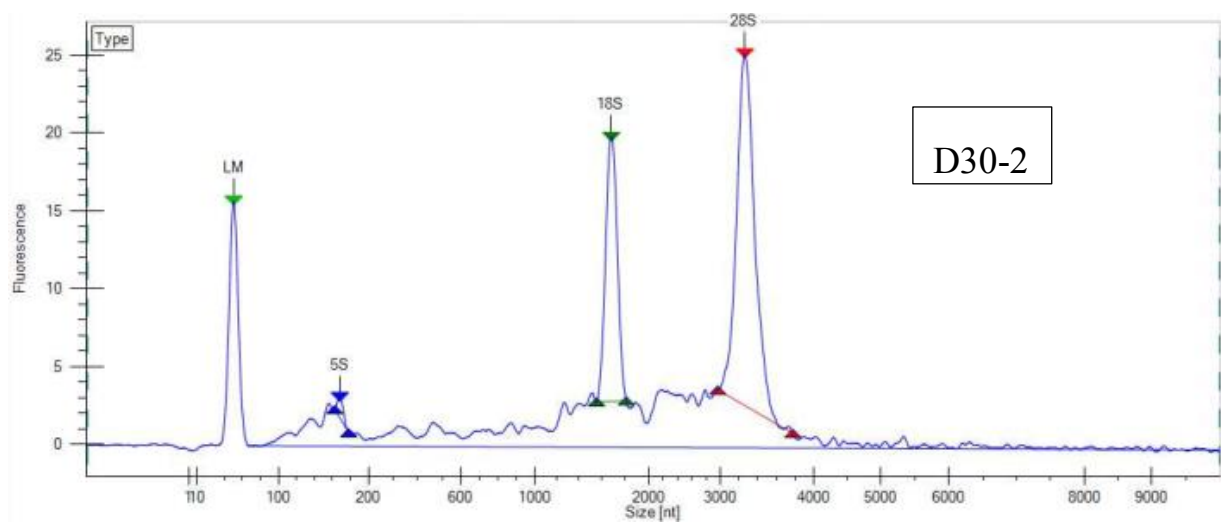

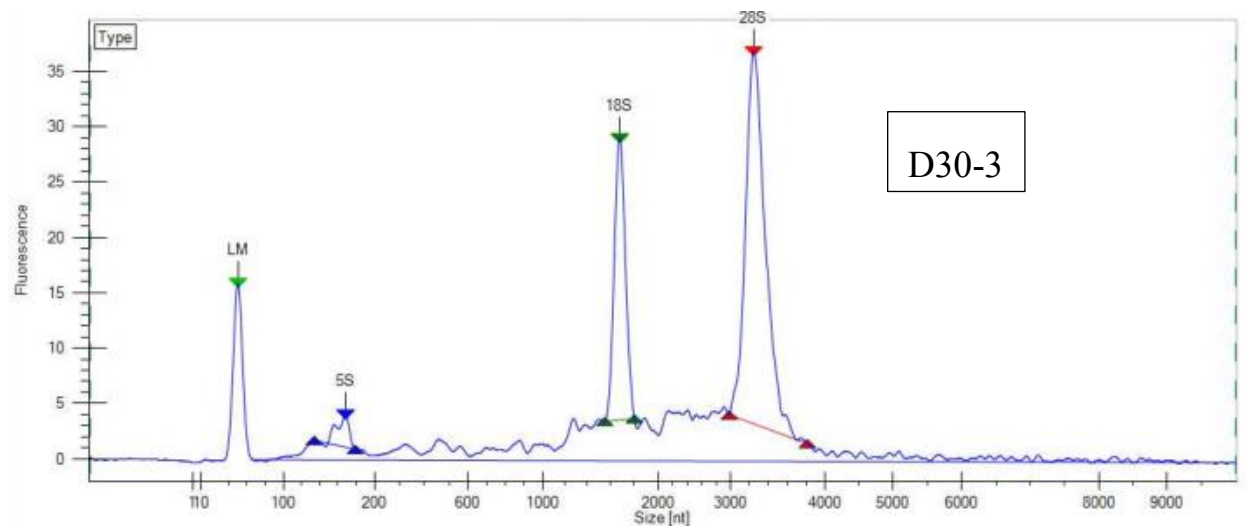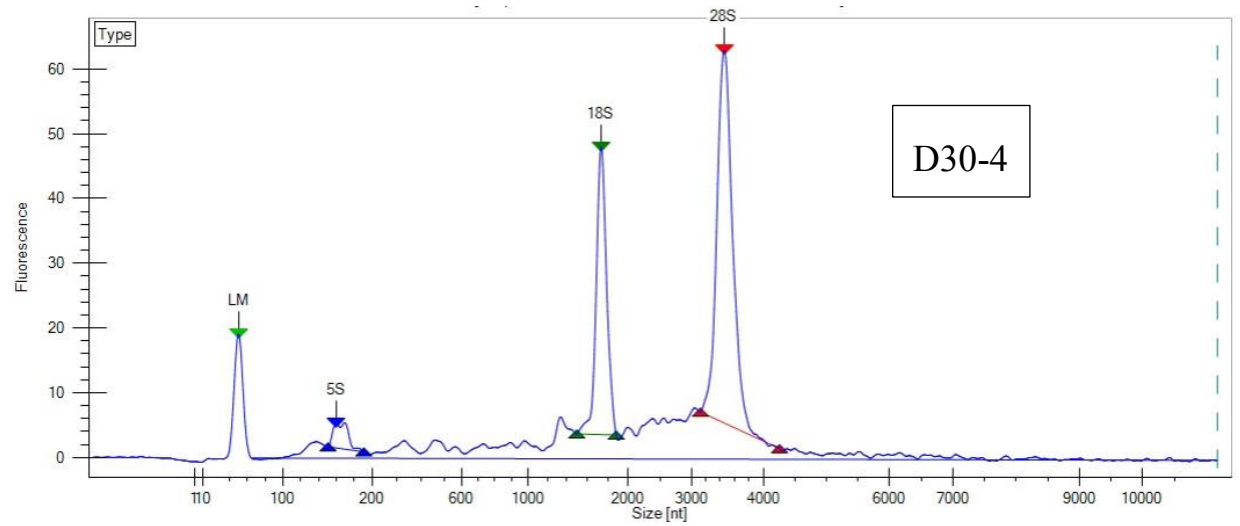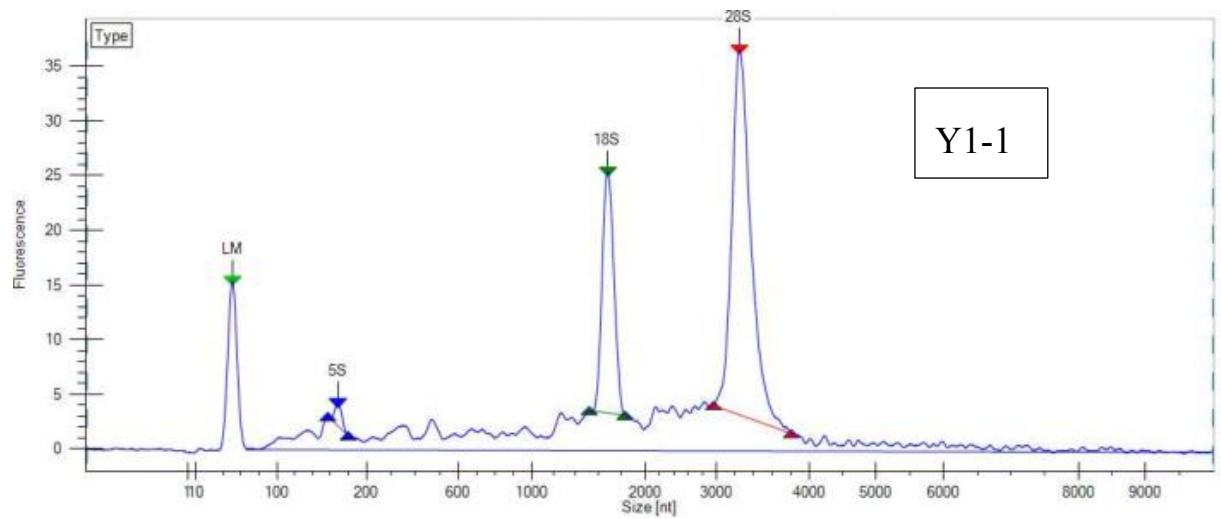

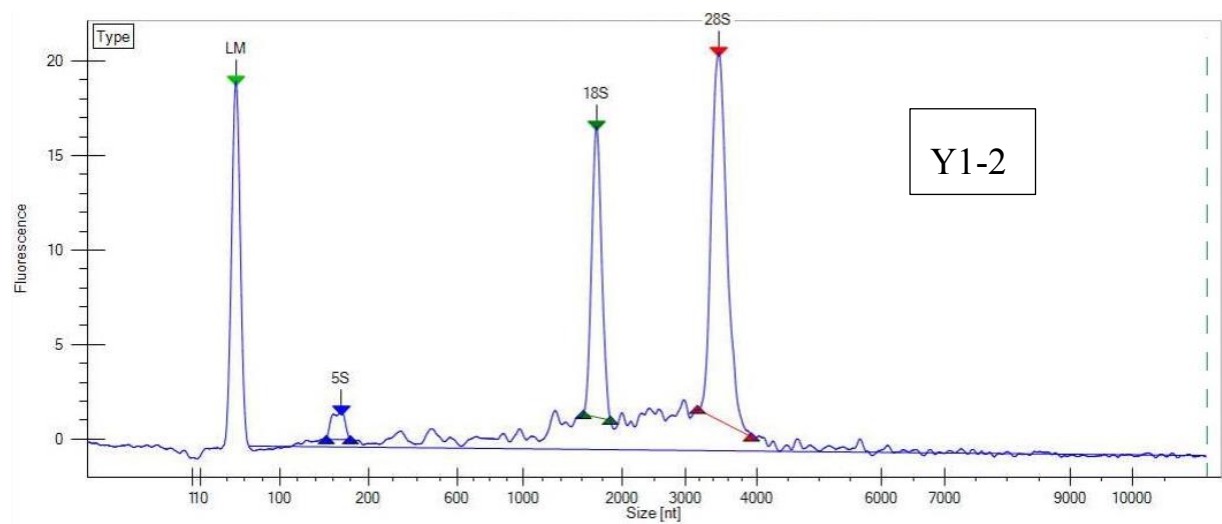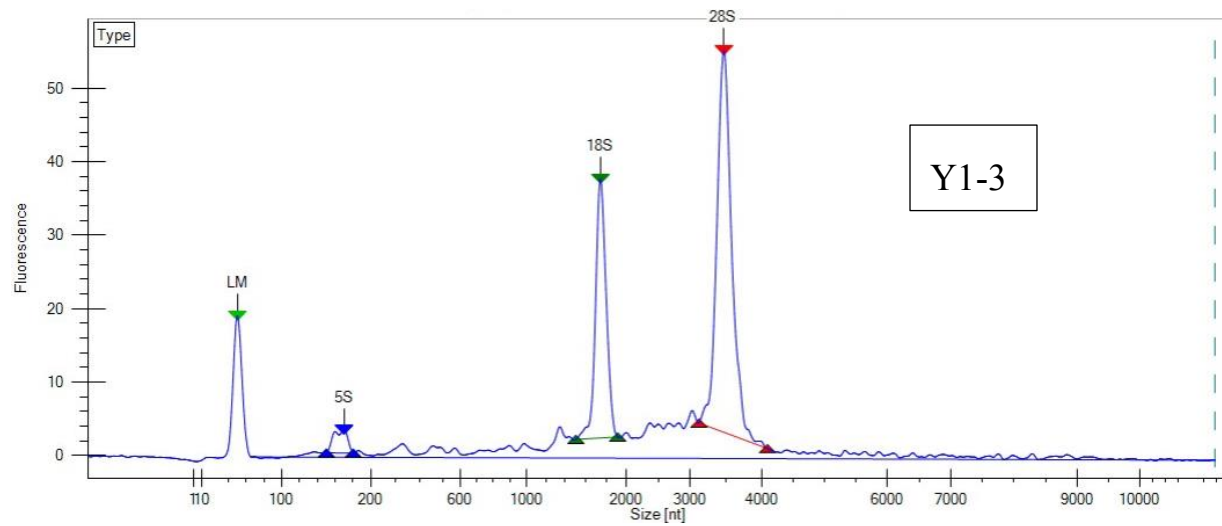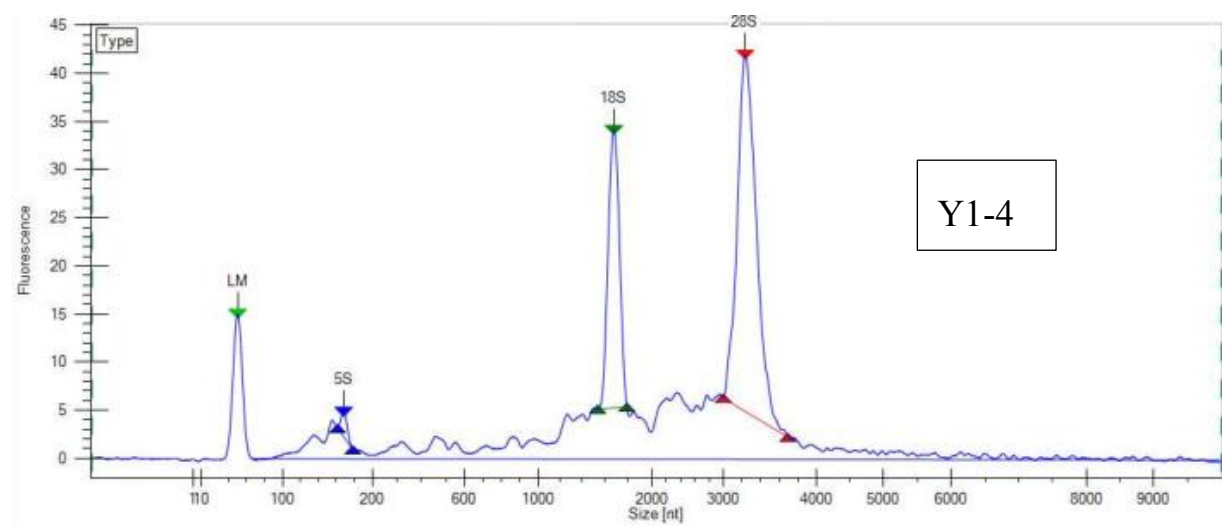

Supplement: s1 [file s1]
